# Supplementary material for: Connecting regional aerosol emissions reductions to local and remote precipitation responses
Source: Copernicus journal article supplement (doi:10.5194/acp-2018-516), 2018-06-05
Supplement: Supplementary file 1 [file acp-2018-516-supplement.pdf]

**Supporting information for...**

**Connecting regional aerosol emissions reductions to local and remote precipitation responses**

**Daniel M. Westervelt<sup>1,5</sup>, Andrew J. Conley<sup>2</sup>, Arlene M. Fiore<sup>1,3</sup>, Jean-François Lamarque<sup>2</sup>, Drew T. Shindell<sup>4</sup>, Michael Previdi<sup>1</sup>, Nora R. Mascioli<sup>1,3</sup>, Greg Faluvegi<sup>5,6</sup>, Gustavo Correa<sup>1</sup>, Larry W. Horowitz<sup>7</sup>**

<sup>1</sup>Lamont-Doherty Earth Observatory, Columbia University. Palisades, New York, USA

<sup>2</sup>National Center for Atmospheric Research, Boulder. Colorado, USA

<sup>3</sup>Department of Earth and Environmental Sciences, Columbia University, Palisades, New York, USA

<sup>4</sup>Nicholas School of the Environment, Duke University. Durham, NC, USA

<sup>5</sup>NASA Goddard Institute for Space Studies, New York, New York, USA

<sup>6</sup>Center for Climate Systems Research, Columbia University, New York, NY, USA

<sup>7</sup>National Oceanic and Atmospheric Administration, Geophysical Fluid Dynamics Laboratory, Princeton, NJ, USA

*Correspondence to:* Daniel M. Westervelt (danielmw@ldeo.columbia.edu)

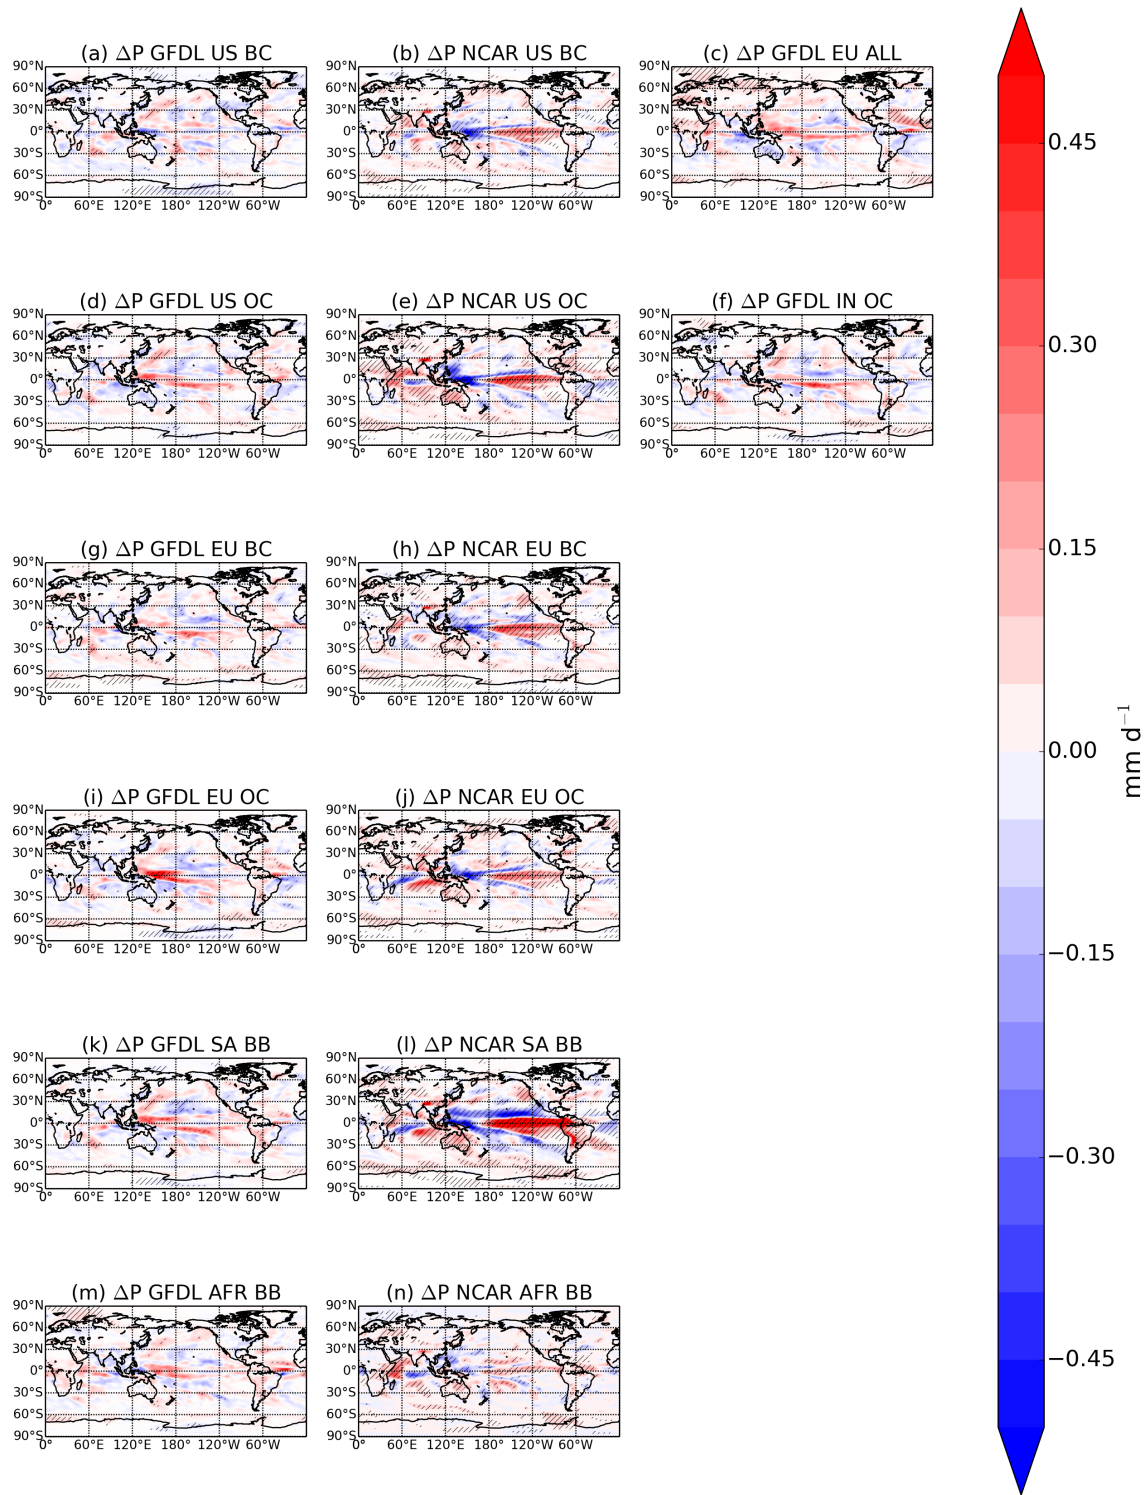

**Figure S1: 200-year annual mean precipitation response to aerosol emissions decreases in each of the three models (GFDL-CM3, first column; NCAR-CESM1, second column; GISS-E2, third column) for several different regional emissions decreases (see Table 1)**

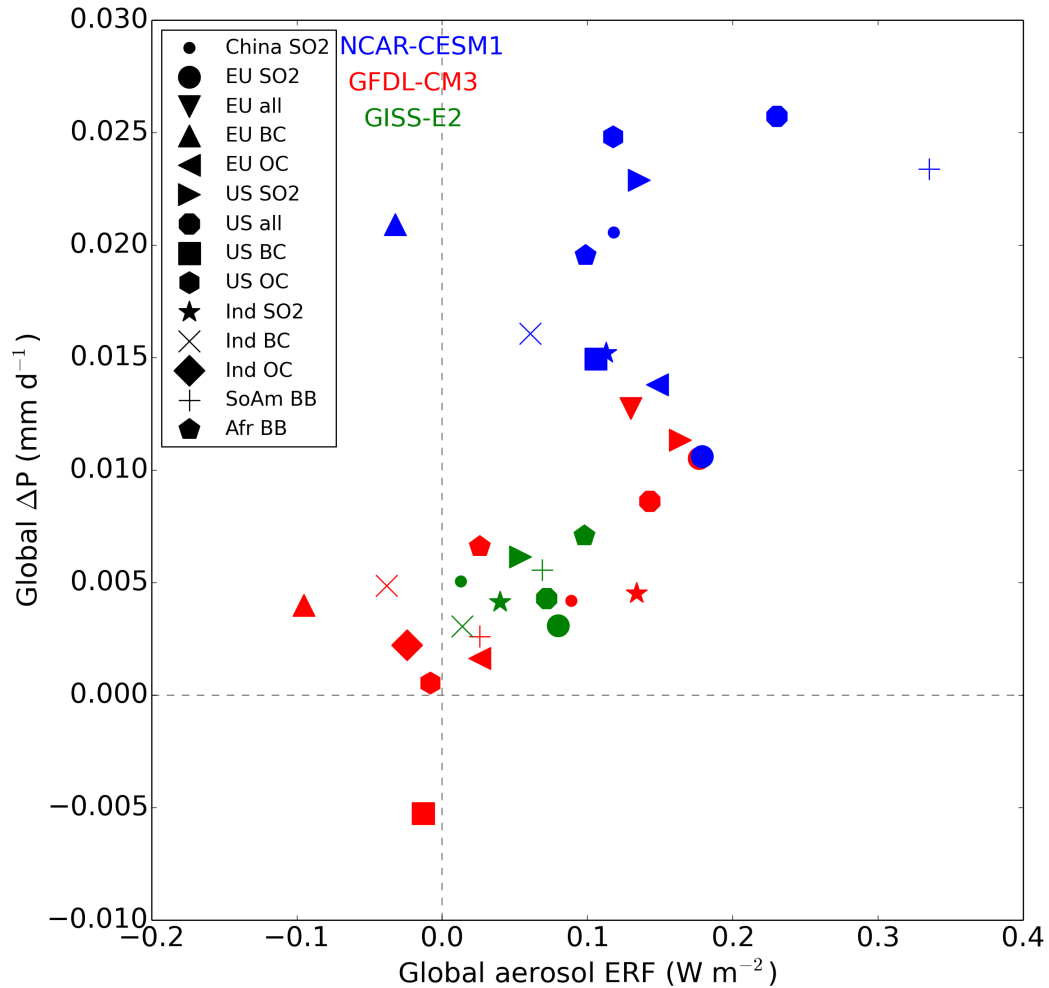

**Figure S2: Scatterplot of global aerosol effective radiative forcing and precipitation response for GFDL-CM3 (red), NCAR-CESM1 (blue), and GISS-E2 (green)**

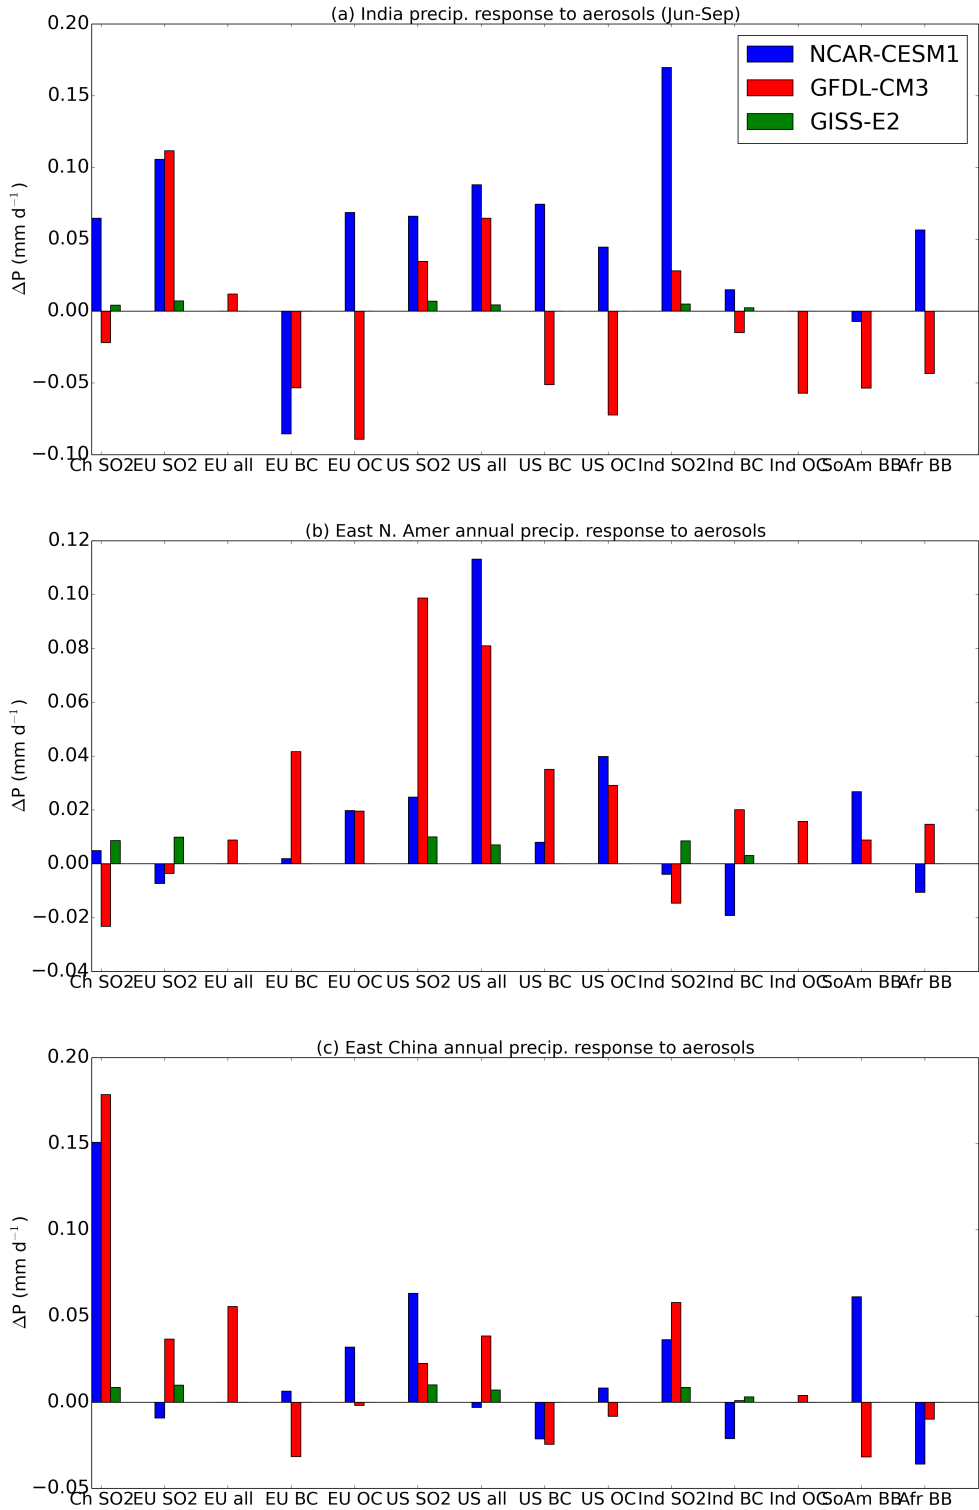

**Figure S3: Regional and global precipitation response to each individual aerosol emissions decrease (Table 1). (a) India, Jun-Sep, (b) Eastern North America, annual, (c) Eastern China, annual**

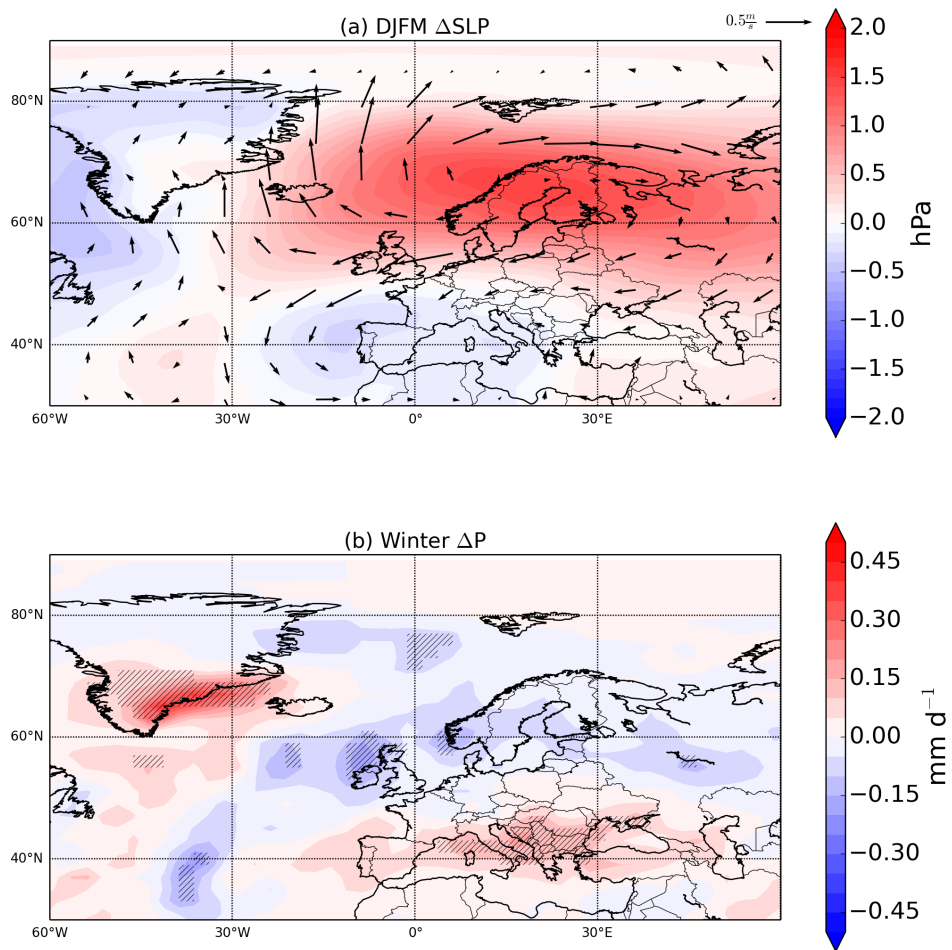

**Figure S4: Wintertime response in sea-level pressure and surface winds (a) and precipitation (b) to reduction of European BC emissions in GFDL-CM3**

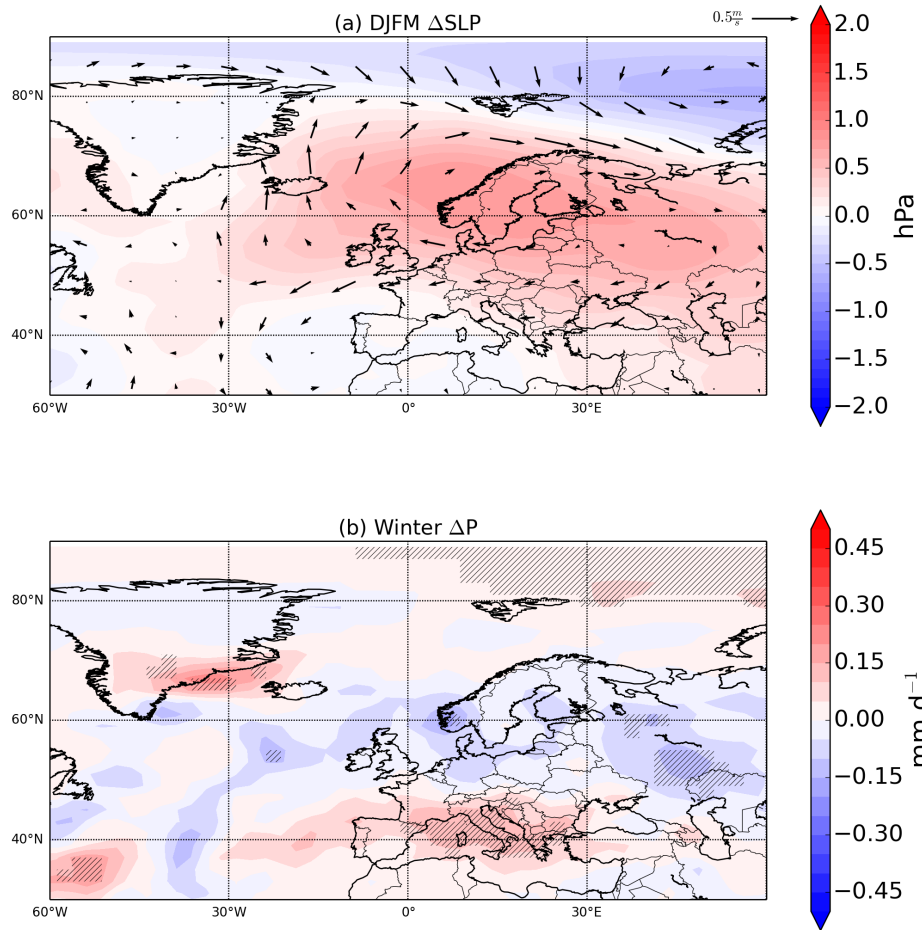

**Figure S5: Same as S4, but for European OA emissions**

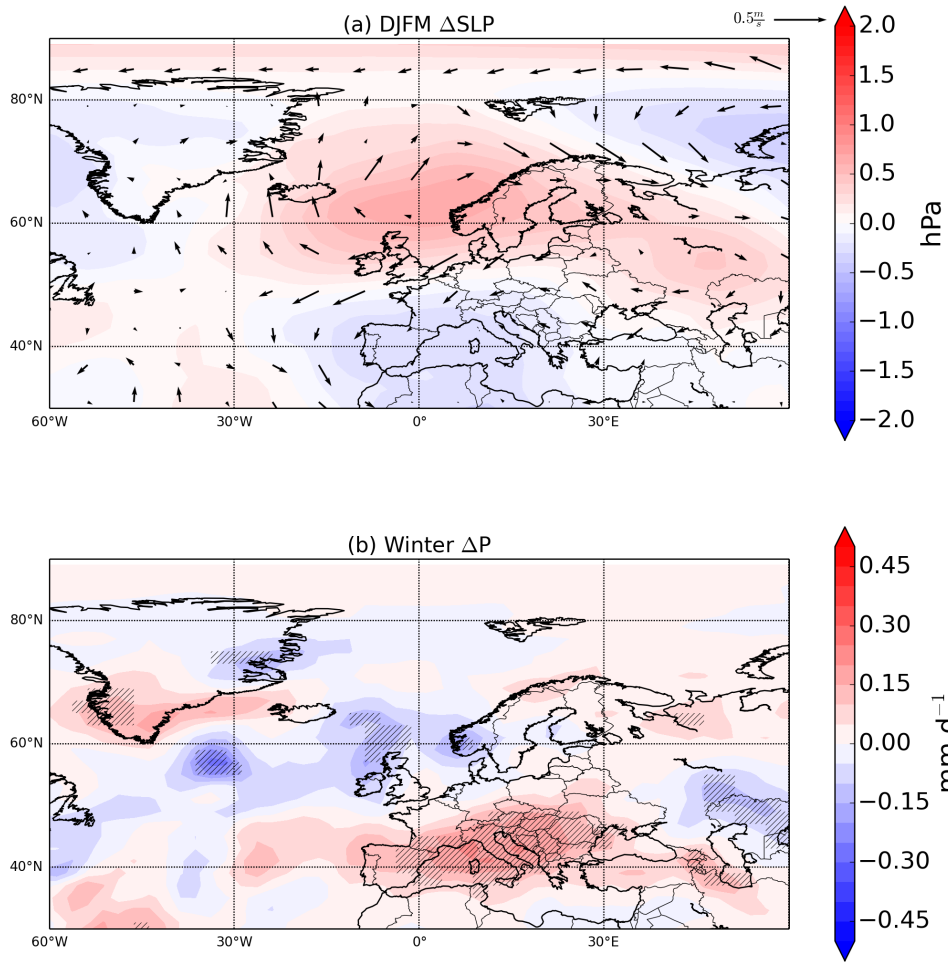

**Figure S6:** Same as S5, but for an emissions sum of BC, OA, and SO<sub>2</sub>

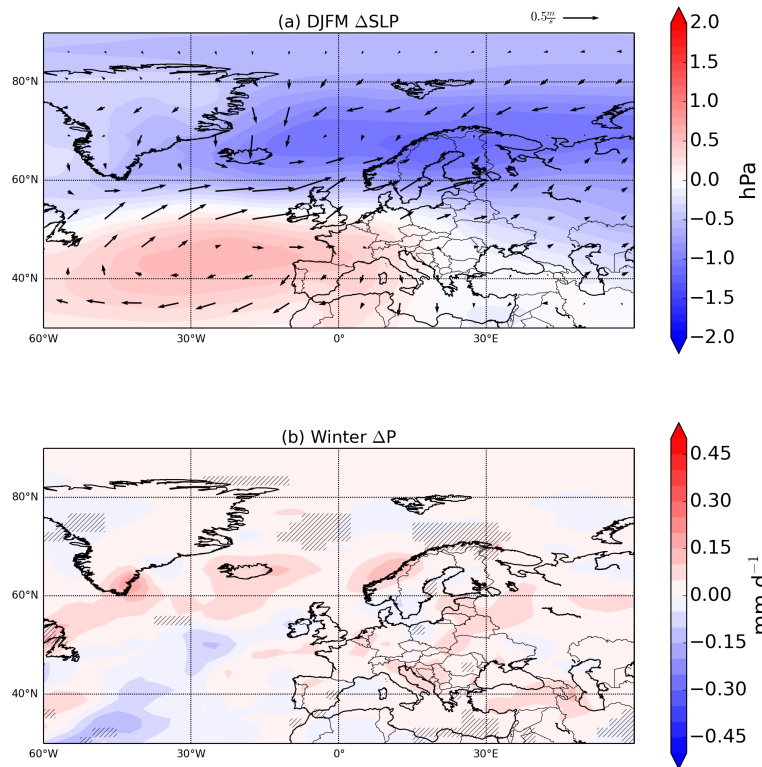

**Figure S7: Wintertime response in sea-level pressure and surface winds (a) and precipitation (b) to reduction of European SO<sub>2</sub> emissions in NCAR-CESM1**



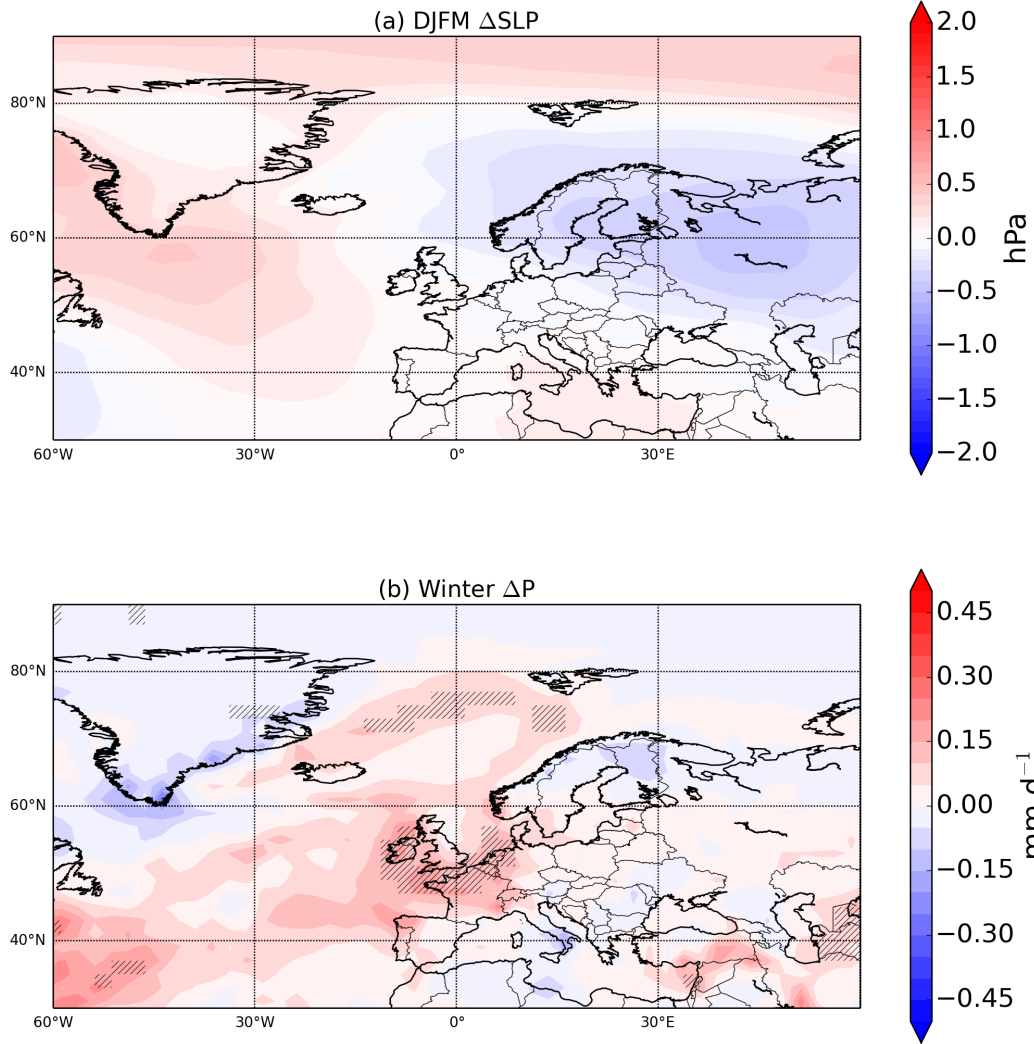

**Figure S8: Wintertime response in sea-level pressure (a) and precipitation (b) to reduction of European SO<sub>2</sub> emissions in GISS-E2**
